# Supplementary material for: Understanding the Nucleophilic Character and Stability of the Carbanions and Alkoxides of 1-(9-Anthryl)ethanol and Derivatives
Source: PubMed Central journal article supplement (PMC6270014; doi:10.3390/molecules180910254), 2013-08-22

# Supplementary Materials

Computed Cartesian Coordinates and Energies of 1b–1g and 2b–2g. Calculated at the B3LYP/6–31+G(d,p) level of theory.

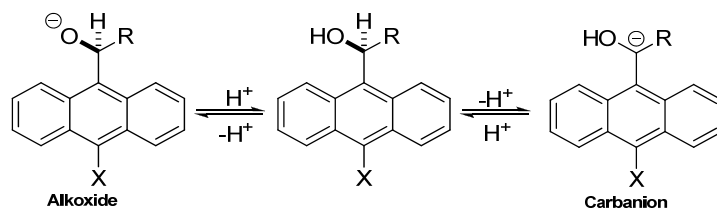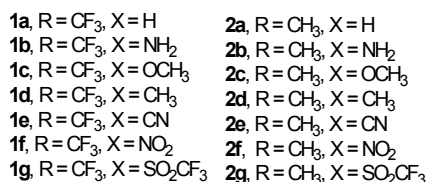

## Carbanion 1b

E Gibbs = -1045.7339 a.u.

E scf = -1045.6894 a.u.

Enthalpy = -1045.6712 a.u.

|   |           |           |           |
|---|-----------|-----------|-----------|
| C | 0.000000  | 0.000000  | 0.000000  |
| C | 0.000000  | 0.000000  | 1.387386  |
| C | 1.237303  | 0.000000  | 2.072171  |
| C | 2.424486  | 0.083054  | 1.373127  |
| C | 2.447881  | 0.156852  | -0.056015 |
| C | 1.194470  | 0.009001  | -0.753924 |
| C | 1.184147  | -0.086381 | -2.214708 |
| C | 2.301542  | 0.593250  | -2.889161 |
| C | 3.539630  | 0.767732  | -2.148728 |
| C | 3.633286  | 0.424915  | -0.777189 |
| C | 4.653934  | 1.327939  | -2.853386 |
| C | 4.564233  | 1.743326  | -4.168099 |
| C | 3.344863  | 1.627036  | -4.863322 |
| C | 2.247644  | 1.059224  | -4.222746 |
| C | 0.197255  | -0.799863 | -2.887084 |
| C | -0.660106 | -1.884750 | -2.366155 |
| O | -0.047499 | -0.591352 | -4.255118 |
| F | -1.995885 | -1.563704 | -2.119493 |
| F | -0.226647 | -2.511246 | -1.253500 |
| F | -0.775380 | -2.892086 | -3.333177 |
| H | -0.011077 | -1.445309 | -4.708435 |
| H | -0.947455 | 0.004372  | -0.529152 |
| H | -0.938381 | 0.003296  | 1.935768  |
| H | 1.254901  | -0.034713 | 3.160515  |
| H | 3.376884  | 0.125879  | 1.890377  |
| N | 4.876002  | 0.523389  | -0.045052 |
| H | 5.591785  | 1.458677  | -2.321399 |
| H | 5.434677  | 2.178961  | -4.656351 |
| H | 3.255336  | 1.975140  | -5.889371 |
| H | 1.313234  | 0.974635  | -4.758276 |
| H | 5.207111  | 1.486343  | 0.025087  |
| H | 5.614924  | -0.008222 | -0.498960 |

**Alkoxide 1b****E Gibbs = -1045.7462 a.u.****E scf = -1045.7014 a.u.****Enthalpy = -1045.6836 a.u.**

|   |           |           |           |
|---|-----------|-----------|-----------|
| C | 0.000000  | 0.000000  | 0.000000  |
| C | 0.000000  | 0.000000  | 1.372459  |
| C | 1.226678  | 0.000000  | 2.089738  |
| C | 2.412561  | 0.012507  | 1.399766  |
| C | 2.456668  | 0.030835  | -0.032787 |
| C | 1.208349  | 0.020811  | -0.779084 |
| C | 1.199567  | 0.038928  | -2.198486 |
| C | 2.450411  | 0.016351  | -2.869155 |
| C | 3.698136  | -0.020395 | -2.135264 |
| C | 3.685950  | 0.044771  | -0.724670 |
| C | 4.928729  | -0.119331 | -2.864813 |
| C | 4.946953  | -0.139351 | -4.237376 |
| C | 3.728561  | -0.046349 | -4.963922 |
| C | 2.526402  | 0.029870  | -4.305599 |
| C | -0.143829 | 0.151364  | -3.022617 |
| C | -0.637915 | -1.304275 | -3.346867 |
| O | -0.106267 | 0.912925  | -4.113867 |
| F | -1.896470 | -1.293273 | -3.871124 |
| F | -0.720081 | -2.131847 | -2.242022 |
| F | 0.137292  | -1.973568 | -4.243632 |
| H | -0.921329 | 0.472646  | -2.288223 |
| H | -0.949525 | -0.024153 | -0.516547 |
| H | -0.943593 | -0.015660 | 1.912222  |
| H | 1.226246  | -0.025328 | 3.176810  |
| H | 3.337648  | -0.032259 | 1.967194  |
| N | 4.908125  | 0.071433  | -0.010924 |
| H | 5.867875  | -0.226861 | -2.329764 |
| H | 5.893672  | -0.230603 | -4.766050 |
| H | 3.749499  | -0.034882 | -6.051217 |
| H | 1.579004  | 0.152635  | -4.825054 |
| H | 4.832403  | 0.522710  | 0.891262  |
| H | 5.657282  | 0.505348  | -0.535128 |

**Carbanion 1c****E Gibbs = -1104.8894 a.u.****E scf = -1104.8432 a.u.****Enthalpy = -1104.8238 a.u.**

|   |           |           |           |
|---|-----------|-----------|-----------|
| C | -1.228657 | 1.843777  | -0.882266 |
| C | -1.046853 | 3.219802  | -0.865736 |
| C | 0.113554  | 3.753050  | -0.258335 |
| C | 1.097152  | 2.913709  | 0.222920  |
| C | 0.967027  | 1.489807  | 0.138963  |
| C | -0.289279 | 0.948703  | -0.324158 |
| C | -0.540186 | -0.492509 | -0.253113 |
| C | 0.658647  | -1.345651 | -0.250480 |

|   |           |           |           |
|---|-----------|-----------|-----------|
| C | 1.915105  | -0.767065 | 0.186982  |
| C | 2.021199  | 0.614925  | 0.443386  |
| C | 3.044165  | -1.632630 | 0.340975  |
| C | 2.982713  | -2.972238 | 0.018646  |
| C | 1.784228  | -3.522478 | -0.483778 |
| C | 0.657370  | -2.717876 | -0.603049 |
| C | -1.842400 | -0.985853 | -0.164148 |
| C | -3.037785 | -0.308794 | 0.371971  |
| O | -2.144439 | -2.311837 | -0.521530 |
| F | -3.995695 | 0.113345  | -0.555405 |
| F | -2.817474 | 0.755510  | 1.171444  |
| F | -3.774133 | -1.210115 | 1.154362  |
| H | -2.606286 | -2.732937 | 0.217361  |
| H | -2.118426 | 1.435642  | -1.349452 |
| H | -1.788705 | 3.875288  | -1.313820 |
| H | 0.246499  | 4.831739  | -0.193661 |
| H | 2.000426  | 3.321061  | 0.666018  |
| H | 3.964870  | -1.202218 | 0.720943  |
| H | 3.864197  | -3.599282 | 0.142005  |
| H | 1.734767  | -4.569678 | -0.771954 |
| H | -0.257290 | -3.147265 | -0.984160 |
| O | 3.240719  | 1.137586  | 0.908347  |
| C | 4.133735  | 1.522683  | -0.134141 |
| H | 3.693568  | 2.300167  | -0.772980 |
| H | 5.034601  | 1.919198  | 0.347926  |
| H | 4.408861  | 0.665478  | -0.764222 |

**Alkoxide 1c****E Gibbs = -1104.9005 a.u.****E scf = -1104.8540 a.u.****Enthalpy = -1104.8349 a.u.**

|   |           |           |           |
|---|-----------|-----------|-----------|
| C | 0.000000  | 0.000000  | 0.000000  |
| C | 0.000000  | 0.000000  | 1.372901  |
| C | 1.225513  | 0.000000  | 2.097229  |
| C | 2.415934  | 0.019598  | 1.417843  |
| C | 2.451326  | 0.038995  | -0.014009 |
| C | 1.212547  | 0.026440  | -0.771670 |
| C | 1.227155  | 0.045054  | -2.193803 |
| C | 2.485113  | 0.038777  | -2.854879 |
| C | 3.722744  | 0.015075  | -2.103178 |
| C | 3.671739  | 0.050726  | -0.702099 |
| C | 4.974660  | -0.052367 | -2.796433 |
| C | 5.015712  | -0.068250 | -4.167207 |
| C | 3.807516  | -0.001851 | -4.918349 |
| C | 2.588460  | 0.053822  | -4.289553 |
| C | -0.108633 | 0.147742  | -3.032916 |
| C | -0.590268 | -1.312749 | -3.353551 |
| O | -0.059825 | 0.905182  | -4.124774 |
| F | -1.835559 | -1.310388 | -3.905942 |
| F | -0.693613 | -2.128419 | -2.242018 |

|   |           |           |           |
|---|-----------|-----------|-----------|
| F | 0.208362  | -1.986956 | -4.225431 |
| H | -0.893626 | 0.469058  | -2.306171 |
| H | -0.948041 | -0.025650 | -0.519405 |
| H | -0.944710 | -0.018127 | 1.910635  |
| H | 1.215043  | -0.022102 | 3.184503  |
| H | 3.360152  | -0.004200 | 1.951762  |
| H | 5.885579  | -0.115923 | -2.210421 |
| H | 5.972666  | -0.129700 | -4.681780 |
| H | 3.852366  | 0.011158  | -6.004910 |
| H | 1.651985  | 0.160181  | -4.830736 |
| O | 4.861342  | 0.056280  | 0.026560  |
| C | 5.379589  | 1.362742  | 0.274376  |
| H | 4.677809  | 1.961862  | 0.870035  |
| H | 6.310034  | 1.229667  | 0.834291  |
| H | 5.590094  | 1.892558  | -0.663578 |

**Carbanion 1d****E Gibbs = -1029.6859 a.u.****E scf = -1029.6411 a.u.****Enthalpy = -1029.6228 a.u.**

|   |           |           |           |
|---|-----------|-----------|-----------|
| C | -0.029368 | 0.096719  | -0.014623 |
| C | -0.027833 | 0.144865  | 1.373117  |
| C | 1.210126  | 0.120886  | 2.050703  |
| C | 2.397579  | 0.121303  | 1.344107  |
| C | 2.431773  | 0.130290  | -0.089738 |
| C | 1.159962  | 0.026865  | -0.768817 |
| C | 1.131406  | -0.106643 | -2.225737 |
| C | 2.255296  | 0.538523  | -2.918426 |
| C | 3.512097  | 0.656397  | -2.200183 |
| C | 3.626789  | 0.298767  | -0.830475 |
| C | 4.625153  | 1.193598  | -2.926562 |
| C | 4.519640  | 1.625302  | -4.234790 |
| C | 3.283788  | 1.553320  | -4.907104 |
| C | 2.184225  | 1.015270  | -4.247351 |
| C | 0.126392  | -0.812850 | -2.874578 |
| C | -0.765796 | -1.851902 | -2.317256 |
| O | -0.113119 | -0.640877 | -4.247937 |
| F | -2.088688 | -1.476211 | -2.082492 |
| F | -0.352698 | -2.452041 | -1.182135 |
| F | -0.913428 | -2.887190 | -3.247148 |
| H | -0.082075 | -1.506910 | -4.678181 |
| H | -0.976341 | 0.125277  | -0.544274 |
| H | -0.962760 | 0.209136  | 1.923205  |
| H | 1.234857  | 0.139425  | 3.139176  |
| H | 3.332263  | 0.165539  | 1.893950  |
| H | 5.575836  | 1.307088  | -2.415865 |
| H | 5.391680  | 2.044368  | -4.734604 |
| H | 3.183972  | 1.915454  | -5.927375 |
| H | 1.234988  | 0.963625  | -4.761267 |
| C | 4.972915  | 0.295329  | -0.144755 |

|   |          |           |           |
|---|----------|-----------|-----------|
| H | 4.974803 | -0.367527 | 0.727244  |
| H | 5.761701 | -0.071269 | -0.812247 |
| H | 5.295385 | 1.290695  | 0.211222  |

**Alkoxide 1d****E Gibbs = -1029.6941 a.u.****E scf = -1029.6481 a.u.****Enthalpy = -1029.6300 a.u.**

|   |           |           |           |
|---|-----------|-----------|-----------|
| C | 0.194976  | -2.569115 | 0.360625  |
| C | 1.088566  | -3.601177 | 0.229573  |
| C | 2.461926  | -3.325263 | -0.006427 |
| C | 2.890153  | -2.025886 | -0.097118 |
| C | 1.993417  | -0.910176 | 0.035583  |
| C | 0.583584  | -1.187643 | 0.274116  |
| C | -0.357249 | -0.131442 | 0.406903  |
| C | 0.107731  | 1.200689  | 0.253270  |
| C | 1.503729  | 1.474345  | -0.023736 |
| C | 2.445675  | 0.421928  | -0.087918 |
| C | 1.895292  | 2.839119  | -0.243673 |
| C | 0.990555  | 3.868725  | -0.173978 |
| C | -0.369271 | 3.603734  | 0.143294  |
| C | -0.793469 | 2.316659  | 0.357817  |
| C | -1.869776 | -0.408331 | 0.781082  |
| C | -2.682299 | -0.558339 | -0.555981 |
| O | -2.439560 | 0.459772  | 1.612043  |
| F | -3.945253 | -1.010683 | -0.313949 |
| F | -2.142628 | -1.467031 | -1.447156 |
| F | -2.824735 | 0.597942  | -1.259340 |
| H | -1.897840 | -1.458269 | 1.157335  |
| H | -0.846782 | -2.806850 | 0.523734  |
| H | 0.743312  | -4.629615 | 0.299580  |
| H | 3.171706  | -4.141467 | -0.120854 |
| H | 3.939364  | -1.841777 | -0.295947 |
| H | 2.927085  | 3.064179  | -0.489152 |
| H | 1.319316  | 4.890417  | -0.355051 |
| H | -1.075232 | 4.426830  | 0.226028  |
| H | -1.809297 | 2.076412  | 0.660995  |
| C | 3.910779  | 0.742776  | -0.309224 |
| H | 4.566987  | -0.066156 | 0.014525  |
| H | 4.136768  | 0.944156  | -1.366497 |
| H | 4.210435  | 1.629241  | 0.257871  |

**Carbanion 1e****E Gibbs = -1082.6723 a.u.****E scf = -1089.6272 a.u.****Enthalpy = -1082.6089 a.u.**

|   |           |          |           |
|---|-----------|----------|-----------|
| C | -0.009450 | 0.013816 | 0.008784  |
| C | -0.006096 | 0.011299 | 1.397614  |
| C | 1.227858  | 0.007290 | 2.077794  |
| C | 2.416404  | 0.078180 | 1.373020  |
| C | 2.433951  | 0.138892 | -0.048719 |

|   |           |           |           |
|---|-----------|-----------|-----------|
| C | 1.185436  | 0.013999  | -0.739448 |
| C | 1.186626  | -0.076773 | -2.208830 |
| C | 2.279056  | 0.660676  | -2.876474 |
| C | 3.524511  | 0.788703  | -2.169576 |
| C | 3.630568  | 0.382240  | -0.796505 |
| C | 4.627379  | 1.365181  | -2.859800 |
| C | 4.504604  | 1.857237  | -4.146569 |
| C | 3.264284  | 1.802811  | -4.808791 |
| C | 2.179843  | 1.205204  | -4.176528 |
| C | 0.264110  | -0.830432 | -2.900036 |
| C | -0.634712 | -1.896190 | -2.368552 |
| O | 0.093291  | -0.678219 | -4.278011 |
| F | -1.949219 | -1.520902 | -2.154262 |
| F | -0.228128 | -2.503301 | -1.238173 |
| F | -0.743575 | -2.911568 | -3.313238 |
| H | 0.089285  | -1.552669 | -4.691677 |
| H | -0.957262 | 0.023630  | -0.519246 |
| H | -0.943133 | 0.014990  | 1.947602  |
| H | 1.250261  | -0.016977 | 3.165341  |
| H | 3.362458  | 0.128050  | 1.904482  |
| C | 4.878622  | 0.422257  | -0.138944 |
| H | 5.576468  | 1.443476  | -2.337420 |
| H | 5.367217  | 2.306337  | -4.634657 |
| H | 3.150721  | 2.215873  | -5.807783 |
| H | 1.230493  | 1.154354  | -4.690595 |
| N | 5.916723  | 0.449142  | 0.409595  |

**Alkoxide 1e****E Gibbs = -1082.6674 a.u.****E scf = -1082.6216 a.u.****Enthalpy = -1082.6034 a.u.**

|   |           |           |           |
|---|-----------|-----------|-----------|
| C | -0.507165 | -2.523324 | -0.484317 |
| C | -1.587358 | -3.365893 | -0.394821 |
| C | -2.887654 | -2.842715 | -0.165857 |
| C | -3.064951 | -1.489500 | -0.028401 |
| C | -1.960842 | -0.584969 | -0.110614 |
| C | -0.630651 | -1.098508 | -0.355072 |
| C | 0.487143  | -0.216686 | -0.449907 |
| C | 0.269429  | 1.182701  | -0.304297 |
| C | -1.048147 | 1.702681  | -0.022745 |
| C | -2.143183 | 0.807696  | 0.062469  |
| C | -1.221412 | 3.107498  | 0.173029  |
| C | -0.153997 | 3.966215  | 0.087476  |
| C | 1.142484  | 3.468808  | -0.215566 |
| C | 1.347492  | 2.126535  | -0.416133 |
| C | 1.932606  | -0.760122 | -0.787303 |
| C | 2.666010  | -1.039089 | 0.574028  |
| O | 2.655619  | -0.010220 | -1.609938 |
| F | 3.849563  | -1.676329 | 0.367772  |
| F | 1.956583  | -1.858547 | 1.429709  |
| F | 2.955436  | 0.078707  | 1.292717  |

|   |           |           |           |
|---|-----------|-----------|-----------|
| H | 1.783520  | -1.800937 | -1.157603 |
| H | 0.471041  | -2.950551 | -0.654194 |
| H | -1.445370 | -4.438003 | -0.501221 |
| H | -3.741103 | -3.512775 | -0.099809 |
| H | -4.055909 | -1.083279 | 0.150036  |
| C | -3.449562 | 1.315764  | 0.334079  |
| H | -2.215350 | 3.485853  | 0.391674  |
| H | -0.305926 | 5.032548  | 0.239359  |
| H | 1.976011  | 4.160523  | -0.307803 |
| H | 2.307418  | 1.714563  | -0.716598 |
| N | -4.519727 | 1.728449  | 0.554990  |

**Carbanion 1f****E Gibbs = -1194.9352 a.u.****E scf = -1194.8889 a.u.****Enthalpy = -1194.8700 a.u.**

|   |           |           |           |
|---|-----------|-----------|-----------|
| C | 0.000000  | 0.000000  | 0.000000  |
| C | 0.000000  | 0.000000  | 1.389464  |
| C | 1.231904  | 0.000000  | 2.059878  |
| C | 2.430086  | 0.040926  | 1.357671  |
| C | 2.458843  | 0.086980  | -0.061688 |
| C | 1.199669  | 0.002934  | -0.732720 |
| C | 1.193977  | -0.025889 | -2.205425 |
| C | 2.196662  | 0.872061  | -2.812071 |
| C | 3.468418  | 0.967369  | -2.158996 |
| C | 3.650284  | 0.304180  | -0.871145 |
| C | 4.450570  | 1.777955  | -2.787777 |
| C | 4.176147  | 2.490018  | -3.948067 |
| C | 2.913557  | 2.421889  | -4.552751 |
| C | 1.940480  | 1.607815  | -3.984004 |
| C | 0.373259  | -0.823236 | -2.948442 |
| C | -0.492497 | -1.946918 | -2.456389 |
| O | 0.254383  | -0.653789 | -4.323020 |
| F | -1.812603 | -1.612835 | -2.260001 |
| F | -0.076478 | -2.554170 | -1.333616 |
| F | -0.538595 | -2.937750 | -3.424715 |
| H | 0.244661  | -1.523232 | -4.746889 |
| H | -0.942971 | 0.008481  | -0.537607 |
| H | -0.937142 | 0.000434  | 1.939737  |
| H | 1.259125  | -0.009015 | 3.147486  |
| H | 3.369845  | 0.054669  | 1.889371  |
| N | 4.917302  | -0.007392 | -0.388339 |
| H | 5.427990  | 1.841100  | -2.333187 |
| H | 4.955055  | 3.115169  | -4.379827 |
| H | 2.695300  | 2.987175  | -5.455327 |
| H | 0.963598  | 1.534378  | -4.444351 |
| O | 5.049651  | -0.548722 | 0.749847  |
| O | 5.944480  | 0.211097  | -1.097594 |

**Alkoxide 1f****E Gibbs = -1194.9182 a.u.****E scf = -1194.8710 a.u.****Enthalpy = -1194.8520 a.u.**

|   |           |           |           |
|---|-----------|-----------|-----------|
| C | 0.000000  | 0.000000  | 0.000000  |
| C | 0.000000  | 0.000000  | 1.371408  |
| C | 1.228629  | 0.000000  | 2.081282  |
| C | 2.419058  | 0.004557  | 1.401247  |
| C | 2.457734  | 0.007016  | -0.031229 |
| C | 1.210875  | 0.009399  | -0.771867 |
| C | 1.202794  | 0.010342  | -2.197688 |
| C | 2.445058  | -0.013260 | -2.889462 |
| C | 3.700532  | -0.108476 | -2.173042 |
| C | 3.659757  | -0.075457 | -0.763037 |
| C | 4.920367  | -0.172723 | -2.920255 |
| C | 4.908236  | -0.138531 | -4.291806 |
| C | 3.683677  | -0.027262 | -5.002111 |
| C | 2.494135  | 0.045442  | -4.324218 |
| C | -0.152303 | 0.116877  | -3.007963 |
| C | -0.628194 | -1.344050 | -3.334891 |
| O | -0.126923 | 0.896138  | -4.082669 |
| F | -1.878164 | -1.339812 | -3.870448 |
| F | -0.710796 | -2.161344 | -2.225203 |
| F | 0.163790  | -2.005487 | -4.220092 |
| H | -0.922867 | 0.425043  | -2.265689 |
| H | -0.948172 | -0.013767 | -0.517581 |
| H | -0.942072 | -0.004072 | 1.912869  |
| H | 1.230173  | -0.001396 | 3.168326  |
| H | 3.348991  | 0.017915  | 1.954523  |
| N | 4.921550  | -0.137908 | -0.026662 |
| H | 5.862176  | -0.263023 | -2.394600 |
| H | 5.849663  | -0.185556 | -4.834625 |
| H | 3.691172  | 0.022710  | -6.087934 |
| H | 1.539243  | 0.208492  | -4.819093 |
| O | 5.161020  | 0.743027  | 0.812094  |
| O | 5.705221  | -1.065007 | -0.272335 |

**Carbanion 1g****E Gibbs = -1876.0328 a.u.****E scf = -1875.9800 a.u.****Enthalpy = -1875.9562 a.u.**

|   |          |           |           |
|---|----------|-----------|-----------|
| C | 0.000046 | -0.029766 | -0.021078 |
| C | 0.002606 | -0.062767 | 1.366717  |
| C | 1.236231 | -0.106849 | 2.033869  |
| C | 2.430049 | -0.057441 | 1.328705  |
| C | 2.457684 | 0.023999  | -0.088115 |
| C | 1.198086 | -0.038797 | -0.759417 |
| C | 1.188858 | -0.068098 | -2.232078 |
| C | 2.214772 | 0.793527  | -2.853072 |
| C | 3.490093 | 0.864866  | -2.204928 |



|   |           |           |           |
|---|-----------|-----------|-----------|
| C | 3.650278  | 0.227460  | -0.900857 |
| C | 4.504592  | 1.600574  | -2.871302 |
| C | 4.261822  | 2.275557  | -4.058369 |
| C | 2.989199  | 2.257063  | -4.646607 |
| C | 1.984716  | 1.510328  | -4.043788 |
| C | 0.339974  | -0.845069 | -2.966823 |
| C | -0.547461 | -1.948825 | -2.468999 |
| O | 0.212885  | -0.674519 | -4.340689 |
| F | -1.860801 | -1.588586 | -2.271197 |
| F | -0.141633 | -2.561377 | -1.345294 |
| F | -0.614627 | -2.941267 | -3.434234 |
| H | 0.191822  | -1.543585 | -4.765076 |
| H | -0.943250 | 0.007357  | -0.556653 |
| H | -0.932438 | -0.054426 | 1.919943  |
| H | 1.267683  | -0.149843 | 3.120180  |
| H | 3.360657  | -0.068344 | 1.877791  |
| H | 5.494081  | 1.647972  | -2.440303 |
| H | 5.070218  | 2.838657  | -4.519413 |
| H | 2.789511  | 2.806840  | -5.562561 |
| H | 1.001453  | 1.470335  | -4.493934 |
| O | 6.213655  | -0.286513 | -1.348046 |
| O | 5.147470  | -1.121265 | 0.815543  |
| C | 5.913920  | 1.388554  | 0.658092  |
| F | 6.065981  | 2.457544  | -0.156746 |
| F | 5.105706  | 1.772229  | 1.672638  |
| F | 7.124400  | 1.107808  | 1.187551  |
| S | 5.203968  | -0.133148 | -0.280852 |

**Alkoxide 1g****E Gibbs = -1876.0129 a.u.****E scf = -1875.9589 a.u.****Enthalpy = -1875.9352 a.u.**

|   |           |           |           |
|---|-----------|-----------|-----------|
| C | 0.021600  | 0.070333  | -0.015419 |
| C | 1.387667  | 0.200696  | 0.002631  |
| C | 1.957237  | 1.493362  | 0.054457  |
| C | 1.161774  | 2.612844  | 0.113130  |
| C | -0.267278 | 2.526982  | 0.121873  |
| C | -0.855514 | 1.202526  | 0.028881  |
| C | -2.268199 | 1.033271  | 0.010802  |
| C | -3.085086 | 2.124093  | 0.417568  |
| C | -2.543808 | 3.464823  | 0.502993  |
| C | -1.148761 | 3.649324  | 0.226158  |
| C | -3.448133 | 4.510521  | 0.871282  |
| C | -4.767707 | 4.253789  | 1.161551  |
| C | -5.283898 | 2.937396  | 1.112531  |
| C | -4.459376 | 1.901966  | 0.754750  |
| C | -2.899163 | -0.343838 | -0.357987 |
| C | -3.619757 | -0.217630 | -1.749078 |
| O | -3.655664 | -0.851334 | 0.612814  |
| F | -3.947852 | -1.452120 | -2.221186 |

|   |           |           |           |
|---|-----------|-----------|-----------|
| F | -2.811397 | 0.345892  | -2.709935 |
| F | -4.769728 | 0.503788  | -1.758885 |
| H | -2.060027 | -1.001516 | -0.681010 |
| H | -0.411613 | -0.920169 | -0.005440 |
| H | 2.021452  | -0.681522 | -0.000464 |
| H | 3.037680  | 1.612021  | 0.073279  |
| H | 1.637934  | 3.578500  | 0.167496  |
| H | -3.095172 | 5.527068  | 0.937430  |
| H | -5.409708 | 5.079466  | 1.459572  |
| H | -6.317839 | 2.743441  | 1.384584  |
| H | -4.778981 | 0.863685  | 0.770952  |
| O | -1.565647 | 6.242793  | -0.424266 |
| O | 0.749751  | 5.293712  | -0.785981 |
| C | 0.014315  | 5.916919  | 1.691410  |
| F | -1.023602 | 5.934983  | 2.545643  |
| F | 0.976880  | 5.137264  | 2.217263  |
| F | 0.495976  | 7.167741  | 1.584812  |
| S | -0.513722 | 5.293677  | -0.033367 |

**Carbanion 2b****E Gibbs = -747.9674 a.u.****E scf = -747.9268 a.u.****Enthalpy = -747.9110 a.u.**

|   |           |           |           |
|---|-----------|-----------|-----------|
| C | 0.000000  | 0.000000  | 0.000000  |
| C | 0.000000  | 0.000000  | 1.401248  |
| C | 1.235858  | 0.000000  | 2.070252  |
| C | 2.428905  | 0.055419  | 1.359903  |
| C | 2.452432  | 0.101915  | -0.065025 |
| C | 1.185738  | -0.005801 | -0.745306 |
| C | 1.222218  | -0.131920 | -2.220290 |
| C | 2.304364  | 0.648002  | -2.870859 |
| C | 3.566134  | 0.729799  | -2.161771 |
| C | 3.652564  | 0.306569  | -0.811339 |
| C | 4.661915  | 1.310462  | -2.877983 |
| C | 4.507694  | 1.864346  | -4.144480 |
| C | 3.253934  | 1.885279  | -4.773244 |
| C | 2.171082  | 1.272404  | -4.117753 |
| C | 0.464316  | -1.030932 | -2.914043 |
| C | -0.525899 | -2.013657 | -2.366619 |
| O | 0.581868  | -1.207403 | -4.287462 |
| H | -1.566888 | -1.698731 | -2.534577 |
| H | -0.388405 | -2.162102 | -1.294398 |
| H | -0.394556 | -2.970680 | -2.887530 |
| H | 1.344364  | -0.683103 | -4.587668 |
| H | -0.948976 | 0.004975  | -0.530923 |
| H | -0.936816 | -0.005289 | 1.953097  |
| H | 1.263481  | -0.023040 | 3.159193  |
| H | 3.381683  | 0.085775  | 1.878136  |
| N | 4.899392  | 0.389540  | -0.080635 |
| H | 5.639726  | 1.343056  | -2.404931 |

|   |          |           |           |
|---|----------|-----------|-----------|
| H | 5.371482 | 2.305528  | -4.640448 |
| H | 3.118628 | 2.351842  | -5.745321 |
| H | 1.186424 | 1.315768  | -4.581187 |
| H | 5.266560 | 1.343577  | -0.057162 |
| H | 5.618837 | -0.184878 | -0.514066 |

**Alkoxide 2b****E Gibbs = -747.9613 a.u.****E scf = -747.9202 a.u.****Enthalpy = -747.9045 a.u.**

|   |           |           |           |
|---|-----------|-----------|-----------|
| C | 0.000000  | 0.000000  | 0.000000  |
| C | 0.000000  | 0.000000  | 1.374206  |
| C | 1.228531  | 0.000000  | 2.087412  |
| C | 2.413881  | 0.018724  | 1.394118  |
| C | 2.455497  | 0.036249  | -0.038526 |
| C | 1.205651  | 0.007690  | -0.780291 |
| C | 1.182144  | -0.008545 | -2.203685 |
| C | 2.435354  | -0.018660 | -2.872427 |
| C | 3.689815  | -0.007067 | -2.141648 |
| C | 3.682914  | 0.066470  | -0.733447 |
| C | 4.916891  | -0.079222 | -2.881616 |
| C | 4.924565  | -0.129788 | -4.254636 |
| C | 3.700073  | -0.098232 | -4.975528 |
| C | 2.499073  | -0.042097 | -4.309169 |
| C | -0.185213 | -0.062367 | -2.995122 |
| C | -0.661676 | -1.562004 | -2.950525 |
| O | -0.195677 | 0.423901  | -4.248747 |
| H | -1.645347 | -1.607985 | -3.432299 |
| H | -0.734170 | -1.984332 | -1.936242 |
| H | 0.031083  | -2.176679 | -3.538595 |
| H | -0.903601 | 0.491093  | -2.339404 |
| H | -0.947706 | -0.001049 | -0.521774 |
| H | -0.942810 | -0.004277 | 1.916119  |
| H | 1.231625  | -0.024440 | 3.174782  |
| H | 3.341636  | -0.021139 | 1.957790  |
| N | 4.907195  | 0.112909  | -0.014441 |
| H | 5.865485  | -0.138829 | -2.355209 |
| H | 5.871629  | -0.196919 | -4.787419 |
| H | 3.715889  | -0.113629 | -6.063426 |
| H | 1.523884  | 0.021543  | -4.802023 |
| H | 4.825620  | 0.615081  | 0.861084  |
| H | 5.655541  | 0.528105  | -0.555341 |

**Carbanion 2c****E Gibbs = -807.1254 a.u.****E scf = -807.0823 a.u.****Enthalpy = -807.0650 a.u.**

|   |           |           |           |
|---|-----------|-----------|-----------|
| C | -1.420496 | -2.249019 | -0.452062 |
| C | -2.818448 | -2.283263 | -0.566835 |

|   |           |           |           |
|---|-----------|-----------|-----------|
| C | -3.539032 | -1.095025 | -0.361183 |
| C | -2.880374 | 0.099698  | -0.095200 |
| C | -1.458711 | 0.161104  | -0.006170 |
| C | -0.728095 | -1.077778 | -0.127229 |
| C | 0.733132  | -1.022221 | 0.115606  |
| C | 1.385973  | 0.227724  | -0.352498 |
| C | 0.628178  | 1.451646  | -0.209570 |
| C | -0.741464 | 1.377890  | 0.129512  |
| C | 1.302867  | 2.678104  | -0.494232 |
| C | 2.607978  | 2.697118  | -0.968793 |
| C | 3.309069  | 1.501758  | -1.202529 |
| C | 2.678810  | 0.285128  | -0.892482 |
| C | 1.398393  | -1.939705 | 0.876997  |
| C | 0.833032  | -3.143309 | 1.567679  |
| O | 2.748953  | -1.821055 | 1.179462  |
| H | 3.046673  | -0.951097 | 0.861664  |
| H | -0.851911 | -3.159980 | -0.622619 |
| H | -3.328630 | -3.212208 | -0.808658 |
| H | -4.625801 | -1.100102 | -0.435301 |
| H | -3.442014 | 1.023026  | 0.009237  |
| H | 0.751811  | 3.605592  | -0.372295 |
| H | 3.081283  | 3.653673  | -1.186734 |
| H | 4.315731  | 1.511750  | -1.611799 |
| H | 3.199258  | -0.645781 | -1.113446 |
| H | -0.251654 | -3.072834 | 1.664695  |
| H | 1.065585  | -4.079984 | 1.038844  |
| H | 1.284716  | -3.219978 | 2.564881  |
| O | -1.473336 | 2.580290  | 0.219055  |
| C | -1.649540 | 3.024128  | 1.555556  |
| H | -2.224836 | 3.957985  | 1.514957  |
| H | -2.202533 | 2.286177  | 2.155491  |
| H | -0.683779 | 3.216390  | 2.046281  |

**Alkoxide 2c****E Gibbs = -807.1166 a.u.****E scf = -807.0736 a.u.****Enthalpy = -807.0566 a.u.**

|   |           |           |           |
|---|-----------|-----------|-----------|
| C | -1.580569 | -2.263376 | -0.106954 |
| C | -2.955442 | -2.247357 | -0.105172 |
| C | -3.660696 | -1.012759 | -0.143415 |
| C | -2.962990 | 0.168405  | -0.180809 |
| C | -1.531145 | 0.185804  | -0.171512 |
| C | -0.792924 | -1.063417 | -0.133617 |
| C | 0.634693  | -1.079225 | -0.114843 |
| C | 1.309830  | 0.169997  | -0.207166 |
| C | 0.576109  | 1.422439  | -0.241569 |
| C | -0.823985 | 1.396647  | -0.190725 |
| C | 1.294681  | 2.659598  | -0.315271 |
| C | 2.667422  | 2.673700  | -0.342883 |
| C | 3.397666  | 1.452614  | -0.311000 |

|   |           |           |           |
|---|-----------|-----------|-----------|
| C | 2.745195  | 0.243044  | -0.258776 |
| C | 1.420276  | -2.433436 | 0.069142  |
| C | 1.332553  | -2.769954 | 1.605293  |
| O | 2.683824  | -2.493274 | -0.380883 |
| H | 0.774924  | -3.198255 | -0.430950 |
| H | -1.068297 | -3.216877 | -0.100687 |
| H | -3.506202 | -3.184921 | -0.091954 |
| H | -4.748362 | -1.006989 | -0.159839 |
| H | -3.484747 | 1.118208  | -0.239827 |
| H | 0.727449  | 3.583042  | -0.372588 |
| H | 3.197689  | 3.622375  | -0.408860 |
| H | 4.484614  | 1.477602  | -0.354401 |
| H | 3.245650  | -0.729174 | -0.276517 |
| H | 0.306590  | -2.806305 | 2.002371  |
| H | 1.813144  | -3.743930 | 1.752052  |
| H | 1.904662  | -2.022701 | 2.169080  |
| O | -1.534543 | 2.600261  | -0.189076 |
| C | -1.771377 | 3.124244  | 1.116040  |
| H | -2.310274 | 4.067700  | 0.984221  |
| H | -2.382740 | 2.436661  | 1.716306  |
| H | -0.828715 | 3.314054  | 1.645896  |

**Carbanion 2d****E Gibbs = -731.9195 a.u.****E scf = -731.8787 a.u.****Enthalpy = -731.8627 a.u.**

|   |           |           |           |
|---|-----------|-----------|-----------|
| C | 2.060598  | 1.480154  | -0.515788 |
| C | 3.406759  | 1.094642  | -0.597512 |
| C | 3.741876  | -0.224221 | -0.256389 |
| C | 2.757482  | -1.138329 | 0.105457  |
| C | 1.373629  | -0.784317 | 0.166600  |
| C | 1.057034  | 0.600998  | -0.096948 |
| C | -0.347727 | 1.014696  | 0.111939  |
| C | -1.340432 | -0.016825 | -0.273971 |
| C | -0.990211 | -1.393445 | 0.010468  |
| C | 0.332828  | -1.732754 | 0.407241  |
| C | -2.024535 | -2.360994 | -0.203653 |
| C | -3.265376 | -2.020549 | -0.729937 |
| C | -3.554749 | -0.697125 | -1.096688 |
| C | -2.576886 | 0.283256  | -0.862279 |
| C | -0.705568 | 2.154687  | 0.771150  |
| C | 0.195610  | 3.188620  | 1.375124  |
| O | -2.029851 | 2.476723  | 1.043368  |
| H | -2.576652 | 1.713808  | 0.787912  |
| H | 1.781781  | 2.495980  | -0.785726 |
| H | 4.167127  | 1.803017  | -0.916564 |
| H | 4.780428  | -0.550278 | -0.299802 |
| H | 3.050475  | -2.163116 | 0.312794  |
| H | -1.822101 | -3.405295 | 0.014016  |
| H | -4.008785 | -2.801731 | -0.884227 |

|   |           |           |           |
|---|-----------|-----------|-----------|
| H | -4.506762 | -0.432417 | -1.549032 |
| H | -2.772497 | 1.306517  | -1.179916 |
| H | 1.211343  | 2.808977  | 1.497061  |
| H | 0.246721  | 4.105924  | 0.769334  |
| H | -0.206624 | 3.476062  | 2.355014  |
| C | 0.675195  | -3.156031 | 0.772727  |
| H | 0.905863  | -3.803351 | -0.096254 |
| H | 1.548760  | -3.199861 | 1.434962  |
| H | -0.147471 | -3.640118 | 1.313291  |

**Alkoxide 2d****E Gibbs = -731.9111 a.u.****E scf = -731.8678 a.u.****Enthalpy = -731.8518 a.u.**

|   |           |           |           |
|---|-----------|-----------|-----------|
| C | 2.239575  | 1.453398  | -0.083091 |
| C | 3.547004  | 1.039942  | 0.006423  |
| C | 3.846662  | -0.344744 | 0.094867  |
| C | 2.827261  | -1.264704 | 0.078153  |
| C | 1.447336  | -0.877542 | -0.014721 |
| C | 1.133450  | 0.538782  | -0.085079 |
| C | -0.216770 | 0.993606  | -0.147456 |
| C | -1.239802 | 0.008753  | -0.126594 |
| C | -0.927131 | -1.409822 | -0.035565 |
| C | 0.416817  | -1.845335 | -0.011663 |
| C | -2.028743 | -2.329782 | 0.054277  |
| C | -3.333820 | -1.903004 | 0.035596  |
| C | -3.635899 | -0.520563 | -0.092962 |
| C | -2.622609 | 0.402466  | -0.179798 |
| C | -0.547484 | 2.538466  | -0.176687 |
| C | -0.422873 | 3.034531  | 1.313379  |
| O | -1.710188 | 2.920383  | -0.731513 |
| H | 0.323138  | 2.994868  | -0.709249 |
| H | 2.031878  | 2.512386  | -0.158624 |
| H | 4.350231  | 1.772956  | 0.003921  |
| H | 4.879719  | -0.677275 | 0.171506  |
| H | 3.076012  | -2.317576 | 0.152247  |
| H | -1.832786 | -3.390997 | 0.158117  |
| H | -4.138622 | -2.632649 | 0.112186  |
| H | -4.673461 | -0.195451 | -0.135146 |
| H | -2.779611 | 1.476392  | -0.320413 |
| H | 0.543156  | 2.806640  | 1.788475  |
| H | -0.576624 | 4.119728  | 1.308052  |
| H | -1.224855 | 2.582815  | 1.909753  |
| C | 0.772697  | -3.318044 | 0.040422  |
| H | 1.603023  | -3.551943 | -0.634618 |
| H | 1.077142  | -3.639104 | 1.047739  |
| H | -0.059271 | -3.953765 | -0.264311 |

**Carbanion 2e****E Gibbs = -784.9108 a.u.****E scf = -784.8691 a.u.****Enthalpy = -784.8530 a.u.**

|   |           |           |           |
|---|-----------|-----------|-----------|
| C | -0.261727 | 0.235077  | -1.187455 |
| C | 1.134153  | 0.165388  | -1.239320 |
| C | 1.883224  | 1.165229  | -0.601566 |
| C | 1.247448  | 2.233810  | 0.021401  |
| C | -0.166583 | 2.341641  | 0.053782  |
| C | -0.927589 | 1.267423  | -0.511021 |
| C | -2.398241 | 1.307492  | -0.329402 |
| C | -2.985860 | 2.670850  | -0.383463 |
| C | -2.223369 | 3.737103  | 0.199667  |
| C | -0.852692 | 3.502489  | 0.574656  |
| C | -2.854704 | 5.003676  | 0.318806  |
| C | -4.130398 | 5.235971  | -0.182533 |
| C | -4.830561 | 4.220195  | -0.849936 |
| C | -4.244782 | 2.951638  | -0.942506 |
| C | -3.132217 | 0.223526  | 0.051628  |
| C | -2.643447 | -1.167929 | 0.322981  |
| O | -4.489829 | 0.294757  | 0.322057  |
| H | -4.754754 | 1.229765  | 0.298205  |
| H | -0.852807 | -0.530165 | -1.683681 |
| H | 1.624742  | -0.651373 | -1.762636 |
| H | 2.970699  | 1.124078  | -0.613796 |
| H | 1.838552  | 3.024361  | 0.475636  |
| C | -0.120302 | 4.521147  | 1.214330  |
| H | -2.304821 | 5.813115  | 0.791138  |
| H | -4.572337 | 6.224965  | -0.078420 |
| H | -5.807719 | 4.407554  | -1.287040 |
| H | -4.764191 | 2.169166  | -1.492881 |
| N | 0.487524  | 5.368886  | 1.757627  |
| H | -2.888111 | -1.859976 | -0.495783 |
| H | -1.563723 | -1.191439 | 0.475338  |
| H | -3.145545 | -1.545294 | 1.221981  |

**Alkoxide 2e****E Gibbs = -784.8859 a.u.****E scf = -784.8438 a.u.****Enthalpy = -784.8278 a.u.**

|   |           |           |           |
|---|-----------|-----------|-----------|
| C | -2.202254 | -1.656948 | -0.249592 |
| C | -3.518570 | -1.260396 | -0.210175 |
| C | -3.844777 | 0.114881  | -0.090330 |
| C | -2.842104 | 1.051291  | -0.022370 |
| C | -1.465420 | 0.670672  | -0.058091 |
| C | -1.114783 | -0.726367 | -0.163865 |
| C | 0.255638  | -1.148318 | -0.173092 |
| C | 1.267767  | -0.145405 | -0.138836 |
| C | 0.929043  | 1.257070  | -0.026422 |

|   |           |           |           |
|---|-----------|-----------|-----------|
| C | -0.434439 | 1.641899  | 0.022541  |
| C | 1.977982  | 2.222270  | 0.051283  |
| C | 3.297187  | 1.835644  | 0.018574  |
| C | 3.640781  | 0.464640  | -0.108363 |
| C | 2.660133  | -0.496380 | -0.196424 |
| C | 0.613484  | -2.676333 | -0.160967 |
| C | 0.393240  | -3.142193 | 1.330195  |
| O | 1.811105  | -3.055798 | -0.625750 |
| H | -0.212820 | -3.156223 | -0.739599 |
| H | -1.977868 | -2.709250 | -0.361660 |
| H | -4.309575 | -2.002251 | -0.284447 |
| H | -4.885278 | 0.429319  | -0.063972 |
| H | -3.085859 | 2.106331  | 0.060153  |
| C | -0.775652 | 3.019199  | 0.158167  |
| H | 1.715990  | 3.272642  | 0.137198  |
| H | 4.079508  | 2.589941  | 0.076447  |
| H | 4.687785  | 0.174467  | -0.157604 |
| H | 2.854554  | -1.562882 | -0.334639 |
| N | -1.058329 | 4.148393  | 0.266704  |
| H | -0.604570 | -2.918022 | 1.734036  |
| H | 0.561209  | -4.224258 | 1.352498  |
| H | 1.150006  | -2.669163 | 1.966977  |

**Carbanion 2f****E Gibbs = -897.1772 a.u.****E scf = -897.1345 a.u.****Enthalpy = -897.1178 a.u.**

|   |           |           |           |
|---|-----------|-----------|-----------|
| C | 0.000000  | 0.000000  | 0.000000  |
| C | 0.000000  | 0.000000  | 1.395169  |
| C | 1.228770  | 0.000000  | 2.064509  |
| C | 2.428852  | 0.025647  | 1.357183  |
| C | 2.456093  | 0.047470  | -0.059686 |
| C | 1.196647  | -0.012439 | -0.732155 |
| C | 1.218751  | -0.063669 | -2.209704 |
| C | 2.242627  | 0.824488  | -2.808201 |
| C | 3.521228  | 0.877608  | -2.169073 |
| C | 3.664872  | 0.209160  | -0.875435 |
| C | 4.523675  | 1.649314  | -2.810015 |
| C | 4.263066  | 2.368260  | -3.974950 |
| C | 2.990906  | 2.362060  | -4.555919 |
| C | 1.990780  | 1.589604  | -3.960503 |
| C | 0.502972  | -0.950369 | -2.950920 |
| C | -0.438674 | -2.006699 | -2.455670 |
| O | 0.617336  | -1.039853 | -4.326621 |
| H | -1.484377 | -1.754985 | -2.681108 |
| H | -0.344598 | -2.156860 | -1.380081 |
| H | -0.216275 | -2.947518 | -2.973320 |
| H | 1.332188  | -0.447315 | -4.613428 |
| H | -0.942261 | 0.017843  | -0.541065 |
| H | -0.937606 | 0.003132  | 1.945886  |



|   |          |           |           |
|---|----------|-----------|-----------|
| H | 1.257389 | -0.005290 | 3.152237  |
| H | 3.369362 | 0.027960  | 1.888579  |
| N | 4.912751 | -0.140209 | -0.385374 |
| H | 5.510213 | 1.671672  | -2.370615 |
| H | 5.063548 | 2.953796  | -4.422379 |
| H | 2.777794 | 2.946483  | -5.447501 |
| H | 0.983469 | 1.606799  | -4.371814 |
| O | 5.024308 | -0.685580 | 0.756050  |
| O | 5.954393 | 0.047093  | -1.088977 |

**Alkoxide 2f****E Gibbs = -897.1372 a.u.****E scf = -897.0937 a.u.****Enthalpy = -897.0769 a.u.**

|   |           |           |           |
|---|-----------|-----------|-----------|
| C | 0.000000  | 0.000000  | 0.000000  |
| C | 0.000000  | 0.000000  | 1.373570  |
| C | 1.229954  | 0.000000  | 2.075548  |
| C | 2.418690  | 0.021939  | 1.388423  |
| C | 2.457174  | 0.026578  | -0.043485 |
| C | 1.207408  | -0.007461 | -0.773385 |
| C | 1.178928  | -0.062181 | -2.205413 |
| C | 2.419004  | -0.038507 | -2.903809 |
| C | 3.687437  | -0.063232 | -2.198492 |
| C | 3.665895  | -0.027672 | -0.782543 |
| C | 4.892294  | -0.065850 | -2.968326 |
| C | 4.857278  | -0.049039 | -4.343055 |
| C | 3.623215  | -0.024309 | -5.038046 |
| C | 2.439835  | -0.005043 | -4.339472 |
| C | -0.188578 | -0.207164 | -2.963200 |
| C | -0.582820 | -1.727776 | -2.821968 |
| O | -0.269893 | 0.206989  | -4.235114 |
| H | -1.573719 | -1.840937 | -3.274345 |
| H | -0.607901 | -2.097587 | -1.787151 |
| H | 0.124259  | -2.334104 | -3.399773 |
| H | -0.916100 | 0.344865  | -2.322876 |
| H | -0.947844 | 0.011975  | -0.519761 |
| H | -0.941173 | 0.010128  | 1.917183  |
| H | 1.239020  | -0.002666 | 3.162792  |
| H | 3.348729  | 0.049861  | 1.939496  |
| N | 4.927159  | -0.047676 | -0.063067 |
| H | 5.846704  | -0.095660 | -2.460093 |
| H | 5.794358  | -0.043989 | -4.896348 |
| H | 3.612987  | 0.004387  | -6.125095 |
| H | 1.451539  | 0.060126  | -4.803455 |
| O | 5.108434  | 0.772887  | 0.854816  |
| O | 5.792682  | -0.878086 | -0.389353 |

**Carbanion 2g****E Gibbs = -1578.2756 a.u.****E scf = -1578.2259 a.u.****Enthalpy = -1578.2044 a.u.**

|   |           |           |           |
|---|-----------|-----------|-----------|
| C | 2.109274  | 2.419464  | -1.170076 |
| C | 1.408375  | 3.495156  | -1.715578 |
| C | 0.015561  | 3.407105  | -1.819497 |
| C | -0.655658 | 2.252355  | -1.423764 |
| C | 0.033734  | 1.147741  | -0.870642 |
| C | 1.445413  | 1.273387  | -0.705084 |
| C | 2.156098  | 0.146575  | -0.059612 |
| C | 1.661912  | -1.185860 | -0.485619 |
| C | 0.249706  | -1.347118 | -0.627131 |
| C | -0.590941 | -0.146019 | -0.547918 |
| C | -0.224305 | -2.645964 | -0.930820 |
| C | 0.645860  | -3.717448 | -1.119213 |
| C | 2.031322  | -3.534801 | -1.055019 |
| C | 2.525256  | -2.265045 | -0.748099 |
| C | 3.058653  | 0.296451  | 0.945639  |
| C | 3.521392  | 1.575189  | 1.576900  |
| O | 3.640238  | -0.776605 | 1.595155  |
| H | 3.221011  | -1.593479 | 1.277517  |
| H | 3.192880  | 2.460317  | -1.098536 |
| H | 1.939039  | 4.378996  | -2.060875 |
| H | -0.553972 | 4.232575  | -2.240989 |
| H | -1.728985 | 2.188976  | -1.543113 |
| H | -1.290967 | -2.799906 | -1.024437 |
| H | 0.235034  | -4.697456 | -1.351695 |
| H | 2.714007  | -4.357974 | -1.249561 |
| H | 3.600060  | -2.095505 | -0.737317 |
| O | -2.756746 | -1.566756 | 0.047575  |
| O | -2.981039 | 0.963510  | -0.197392 |
| C | -1.973109 | -0.019896 | 2.019157  |
| S | -2.148094 | -0.218518 | 0.119834  |
| F | -1.203900 | -1.000069 | 2.545415  |
| F | -1.396088 | 1.160654  | 2.338084  |
| F | -3.172415 | -0.066610 | 2.645010  |
| H | 3.494774  | 1.458530  | 2.666776  |
| H | 2.890857  | 2.416969  | 1.290940  |
| H | 4.559617  | 1.808547  | 1.302930  |

**Alkoxide 2g****E Gibbs = -1578.2340 a.u.****E scf = -1578.1844 a.u.****Enthalpy = -1578.1628 a.u.**

|   |           |          |          |
|---|-----------|----------|----------|
| C | 1.964886  | 2.792546 | 0.516201 |
| C | 1.146827  | 3.888494 | 0.672530 |
| C | -0.235421 | 3.753188 | 0.419780 |
| C | -0.774472 | 2.539184 | 0.051444 |

|   |           |           |           |
|---|-----------|-----------|-----------|
| C | 0.031505  | 1.368926  | -0.094179 |
| C | 1.451308  | 1.521706  | 0.121814  |
| C | 2.339808  | 0.412300  | -0.046252 |
| C | 1.772441  | -0.903206 | 0.003942  |
| C | 0.365116  | -1.100387 | -0.241091 |
| C | -0.467894 | 0.062485  | -0.434858 |
| C | -0.107008 | -2.448147 | -0.252226 |
| C | 0.727528  | -3.513859 | 0.010239  |
| C | 2.090105  | -3.308361 | 0.316624  |
| C | 2.592420  | -2.027207 | 0.312760  |
| C | 3.837759  | 0.653060  | -0.166280 |
| C | 4.552744  | -0.107861 | -1.310632 |
| O | 4.247512  | 0.375745  | 1.104105  |
| H | 3.972318  | 1.721205  | -0.457479 |
| H | 3.015339  | 2.858636  | 0.769904  |
| H | 1.556654  | 4.836876  | 1.008880  |
| H | -0.896924 | 4.607876  | 0.539985  |
| H | -1.838648 | 2.476931  | -0.114945 |
| H | -1.148479 | -2.646337 | -0.452631 |
| H | 0.312707  | -4.519134 | 0.013927  |
| H | 2.727429  | -4.146632 | 0.585488  |
| H | 3.605505  | -1.813750 | 0.632393  |
| O | -2.228192 | -1.363345 | -1.879546 |
| O | -2.560668 | 1.145484  | -1.726543 |
| C | -3.281617 | -0.355804 | 0.331292  |
| S | -2.070555 | -0.107416 | -1.126568 |
| F | -2.971756 | -1.452997 | 1.048732  |
| F | -3.269576 | 0.701718  | 1.166601  |
| F | -4.536790 | -0.503775 | -0.134793 |
| H | 5.615079  | 0.160487  | -1.267036 |
| H | 4.159119  | 0.191780  | -2.293048 |
| H | 4.474652  | -1.194703 | -1.226363 |

**Figure S1.** Electrophilic Fukui Function for the alkoxides and carbanions of 1c, 1d, 1e, 1g, 2c, 2d, 2e and 2g.

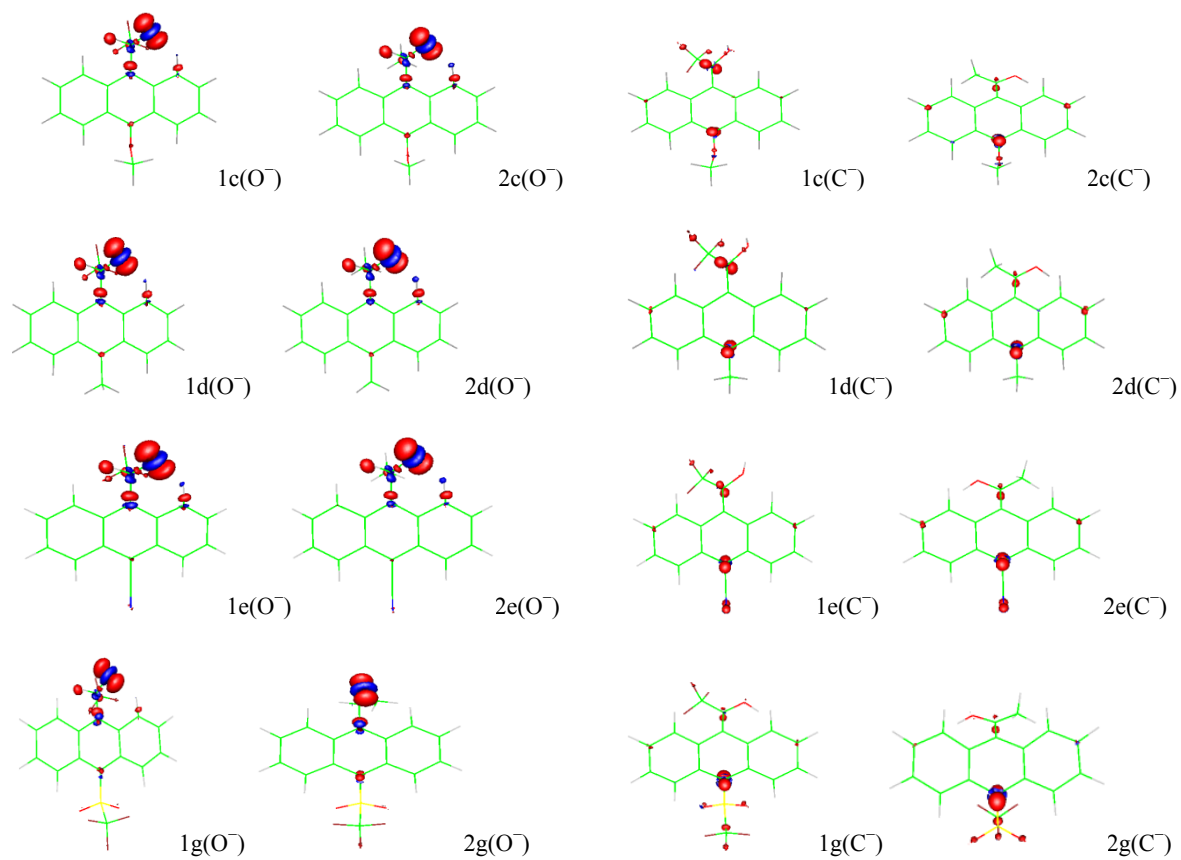

**Figure S2.** MEP for the alkoxides and carbanions of 1c, 1d, 1e, 1g, 2c, 2d, 2e and 2g.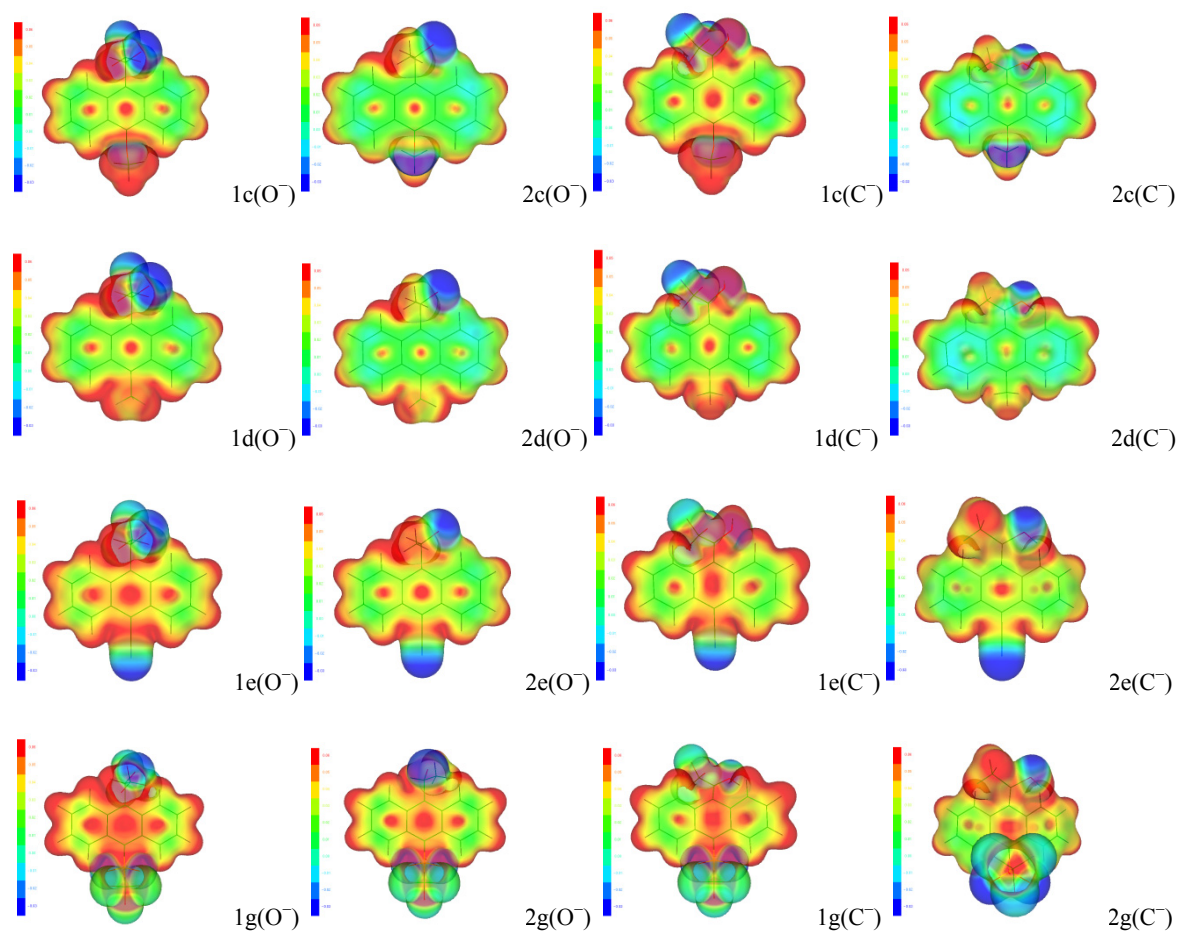

Supplement: molecules-18-10254-s001.pdf [file molecules-18-10254-s001.pdf]
